# Supplementary material for: Why some women who attend focused antenatal care fail to deliver in health facilities: a qualitative study of women’s perspectives from slums of Addis Ababa, Ethiopia
Source: HighWire-hosted journal article supplement (doi:10.1136/bmjopen-2020-039189), 2020-12-01
Supplement: bmjopen-2020-039189supp001_data_supplement.pdf [file bmjopen-2020-039189supp001_data_supplement.pdf]

## ANNEXE 1: IN-DEPTH INTERVIEW SCHEDULE (ENGLISH VERSION)

### Participant Information and Informed Consent Form

Thank you for making time to take part in this interview. My name is *Endalew Gemechu Sendo* and I would like to talk to you about your reasons for attending FANC, which promotes skilled attendance at birth, but decided to deliver your baby at home and not at the health care facility.

Please remember that you are under no obligation to participate in this interview. You can withdraw from the study at this point or end the interview at any point during the interview without explanation or consequences. You do not have to answer any question that makes you uncomfortable. Should we come to any question that you do not want to answer, just let me know and we will go to the next question.

I promise to treat all information collected from this interview as highly confidential and it shall not be reported in a manner that identifies or links you with the results of the study. The interview should take about fifty (50) minutes. I will do the interview and take some notes; my research assistant will be recording this interview because I do not want to miss any of your comments. Because we are on tape, please make sure that you speak up so that we do not miss your important responses.

Do you have any questions regarding what I have just explained to you?

### Informed consent

I, the under signed, acknowledge that *Endalew Gemechu Sendo*, the researcher has explained the research study purpose and activities. I understand the nature of the study and the means by which my identity will be protected and that the information I give will be kept confidential. I have had the opportunity to ask questions and they were answered to my satisfaction. My signature on this form also indicates that I am 18 years old or older and that I give permission to voluntarily participate in this study. My signature here also grants permission for the interview to be recorded.

Name of participant \_\_\_\_\_

Signature of the participant \_\_\_\_\_

Date \_\_\_\_\_

## **In-depth Interview questions**

### Personal information

Please tell me about yourself (age, marital status, your children, highest level of education, your religion and your current employment)

### Questions about focused antenatal care (FANC): facility-based and home deliveries.

1. Would you please tell me your reasons for attending FANC (which promotes the use of skilled attendance at birth) but decided to deliver your baby at home and not at the health facility?

### Additional questions included

1. What prompted you to attend antenatal care?
2. How many times did you receive ANC during this pregnancy?
3. What were the benefits of attending antenatal care?
4. What information did you receive from the health care providers about preparing for giving birth at health facilities?
5. Why did you choose to deliver your current baby at home?
6. What are your views regarding the advantages of home delivery?
7. What is your opinion regarding delivering a baby in the health facility?
  - Would you recommend health facility delivery to your friends? Why not? What are the barriers? What are the benefits of going for institutional delivery?
8. What is your opinion about delivering a baby at home?
  - Would you recommend home delivery to your friends? Why? What are the benefits of delivering a baby at home?

**Thank you very much for taking part in this study.**

**ANNEXE 2: ማከይቅ (In-depth Interview Schedule) – Amharic Version**

በውይይቱ ላይ ለመሳተፍ ፍቃደኛ ስለሆኑ አመሰግናለሁ። በዛሬው እለት ውይይታችንን የምመራው እኔ እንዳለው ገመቹ ሰንዶ ነኝ። ውይይታችን የሚያተኩረው የጤና አገልግሎት በጤና ማእከል ወይም በቤቱ ውስጥ ስለሚሰጥበት ሁኔታ ያላችሁን የግል አስተያየት ነው። በዚህ ጥናት ላይ የሚኖሮትን ተሳትፎ በማንኛውም ጊዜ ለእርስዎ ምቹ የማይሰጥ ሆኖ ሲያገኙት ማቋረጥ ይችላሉ። እኔም የግል ሚስጢርዎን ለመጠበቅ ቃል እገባለሁ። ውይይቱ በግምት 50 ደቂቃ ይወስዳል። ምንም እንኳን ማስታወሻ ብይዝም ድምጽዎን ግን በመቅረጫ እቀርጻለሁ። ምክንያቱም የሚሰጡኝን የትኛውንም መረጃ ማጣት ስለማልፈልግ ነው።

ከላይ በተደረገው ገለጻ ላይ ጥያቄ አለዎት?

እኔ ከታች ፊርማዬ የሰፈረው የጥናቱ አይነት፣ ጥቅም፣ መብቶቼን መረዳቴን እና በፈቃደኝነት ለመሳተፍ እንዲሁም ሚስጢራዊነቱን በመገንዘብ እና ያለምንም አሉታዊ ውጤት ከጥናቱ መውጣት እንደምችል መረዳቴን እገልጻለሁ። ጥያቄዎችን ለመጠየቅ እድል ተሰጥቶኝ የነበረ ከመሆኑም ባሻገር በበቂ ሁኔታ ምላሽ ተሰጥቶኛል።

በዚህ ጥናት ላይ ለመሳተፍ ስምምነቴን እገልጻለሁ።

የተሳታፊ ስም: .....

የተሳታፊ ፊርማ: .....

ቀን: .....

**የመጠይቅ ጥያቄዎች (INTERVIEW QUESTIONS)**

**የግል መረጃ**

እባክዎ ስለ ራስዎ ያብራሩ(ዕድሜ፣ የጋብቻ ሁኔታ፣ ልጆች፣ የትምህርት ደረጃ፣ ሃይማኖት እና የቅጥር ሁኔታ)

**የቅድመ ወሊድ እንክብካቤ ጥያቄዎች(FANC): በጤና ማእከል ወይንም በቤት ውስጥ መውለድ**

1. የቅድመ ወሊድ ክትትል በጤና ማእከል ካደረጉ በኋላ ልጅዎን በቤት መውለድ ለምን ወሰኑ?

**ተጨማሪ ጥያቄዎች:**

- የቅድመ ወሊድ ክትትል ለማረጋገጥ ያነሳሳዎ ምንድነው?
- በመጨረሻው እርግዝናዎ ወቅት ሥንት ጊዜ የቅድመ ወሊድ የጤና ክትትል አደረጉ?
- የቅድመ ወሊድ የጤና ክትትል ጠቀሜታዎች ምንድን ናቸው?
- በቅድመ ወሊድ የጤና ክትትል ወቅት በጤና ማእከል እንዲወልዱ ከጤና ባለሙያዎች ያገኙት መረጃ ምን ነበር?
- ልጅዎን በቤት መውለድ ለምን መረጡ? ጥቅሙስ?
- በቤት መውለድ ጋር ተያይዞ ያለዎት አስተያየት ምንድነው?
- በጤና ማእከል ውስጥ ከመውለድ ጋር ተያይዞ ያለዎት አስተያየት ምንድነው?
  - o ሴቶች በጤና ማእከላት ልጅ እንዲወልዱ ያረታታሉ? ለምን?
  - o ሴቶች በጤና ማእከል ልጆቻቸውን እንዲገለገሉ የሚከለክል ባህል ነክ ልማድ አለ? ካለ ያብራሩት።

**ለተሳትፎዎ እጅግ አመሰግናለሁ**
